# Supplementary material
Source: HighWire-hosted journal article supplement (https://www.cmajopen.ca/highwire/filestream/88249/field_highwire_adjunct_files/2/open-2021-0192-3-at.pdf)
Supplement: open-2021-0192-3-at.pdf [file open-2021-0192-3-at.pdf]

# 1 Supplementary Material

2

| Supplemental Table 2. Effect of legislation on firearm suicides in Canada |      |                             |                                                                                                                                                                                                                                                                                                                                                                                                                                                                         |                                                                                                                                                                             |
|---------------------------------------------------------------------------|------|-----------------------------|-------------------------------------------------------------------------------------------------------------------------------------------------------------------------------------------------------------------------------------------------------------------------------------------------------------------------------------------------------------------------------------------------------------------------------------------------------------------------|-----------------------------------------------------------------------------------------------------------------------------------------------------------------------------|
| Study (Year)                                                              | Bill | Reported beneficial effect? | Effect of legislation <sup>1</sup>                                                                                                                                                                                                                                                                                                                                                                                                                                      | Evidence of method substitution?                                                                                                                                            |
| Mundt (1990)                                                              | C-51 | No                          | • No perceptible effect on suicides                                                                                                                                                                                                                                                                                                                                                                                                                                     | None reported                                                                                                                                                               |
| Rich (1990)                                                               | C-51 | Yes                         | • No change in total suicide rate<br>• % of male suicides by firearm decreased from mean±SE of 23.2%±1.3% to 16.2%±1.1% (difference of 7%±1.7%, $p < 0.001$ )                                                                                                                                                                                                                                                                                                           | % of male suicides by leaping increased                                                                                                                                     |
| Carrington (1994a)                                                        | C-51 | Yes                         | • Age-standardized total suicide rate decreased<br>• Firearm suicide rate had a slight nonsignificant downward trend<br>• T-test for change in slope from pre- to post-legislation was significant for firearm suicides, non-firearm suicides, and total suicides                                                                                                                                                                                                       | No evidence of method substitution                                                                                                                                          |
| Carrington (1994b)                                                        | C-51 | Yes                         | • 9 of 10 provinces had increasing trends in total & firearm suicide rates pre-Bill C-51<br>• All provinces had stable or decreasing total & firearm suicide rates post-Bill C-51<br>• Young male firearm suicide rate decreased post-Bill C-51                                                                                                                                                                                                                         | No evidence of method substitution                                                                                                                                          |
| Leenaars (1993, 1996, 1997, 2003)                                         | C-51 | Yes                         | • Use of firearms for suicide was decreased for those 15-65 years<br><br>Interrupted time-series analysis:<br>• Total, male, & female overall suicide rate trends decreased<br>• Total, male, & female firearm suicide rate trends decreased<br><br>Multiple regression analysis:<br>• Firearm suicide rate and % of suicides by firearm decreased<br>Covariates: Bill C-51, % young males, birth rate, marriage rate, divorce rate, unemployment, median family income | Non-firearm methods increased in 15-24 yr olds<br><br>Non-firearm methods increased in men only<br><br>Nonsignificant increasing trend for use of other methods for suicide |
| Bridges (2004)                                                            | C-17 | Yes                         | • Mean firearm suicide rate decreased from 4.09 per 100,000 (SE 0.09) to 3.17 per 100,000 (SE 0.16)<br>• Rates of firearm suicide and % of suicides using firearms decreased                                                                                                                                                                                                                                                                                            | Raw rate of suicide by all other methods increased. Linear regression showed nonsignificant increase in suicide rate by other methods                                       |
| Caron (2004)                                                              | C-17 | Yes                         | • Firearm suicide rate decreased significantly from 12.7 to 10.0 per 100,000<br>• Overall suicide rate showed a slight nonsignificant increase from 24.5 to 26.8 per 100,000<br>• Decreasing trend in total, male, and female suicide rates                                                                                                                                                                                                                             | Suicide rate by all other methods increased significantly from 11.8 to 16.8 per 100,000                                                                                     |

|                                                                                                                     |      |     |                                                                                                                                                                                                                                                                                                                                                                                                   |                                                                                                                                                                                                                                                  |
|---------------------------------------------------------------------------------------------------------------------|------|-----|---------------------------------------------------------------------------------------------------------------------------------------------------------------------------------------------------------------------------------------------------------------------------------------------------------------------------------------------------------------------------------------------------|--------------------------------------------------------------------------------------------------------------------------------------------------------------------------------------------------------------------------------------------------|
| Cheung (2005)                                                                                                       | C-17 | Yes | <ul style="list-style-type: none"> <li>• No change in total suicide rate</li> <li>• Time series models showed significant decrease in rate of suicide by firearms</li> </ul>                                                                                                                                                                                                                      | Time series models showed significant increase in rate of suicide by hanging                                                                                                                                                                     |
| Caron (2008)                                                                                                        | C-17 | No  | <ul style="list-style-type: none"> <li>• Firearm suicide rates decreased by 17% (16.8% decrease in males, 42.6% decrease in females), but downward trend was not significant when analysis included the trend in firearm suicide rate in 5 years preceding Bill-C17</li> <li>• Decline in suicide rates involving firearms did not result in a parallel decline in total suicide rates</li> </ul> | Correlation analysis suggested replacement of firearm suicide by hanging suicide (more significant among males than females)                                                                                                                     |
| Gagne (2010)                                                                                                        | C-17 | Yes | <ul style="list-style-type: none"> <li>• In males 15-34 yrs, firearm suicide rate decreased (APC -11.1) from 1996-2006</li> <li>• In males 35-64 yrs, firearm suicide rate decreased (APC -5.6) from 1997-2006</li> <li>• Pre/post firearm regulation Poisson regression analysis failed to detect specific point in time when significant changes in trends occurred</li> </ul>                  | Between 1981-2006, male hangings increased, replacing firearms as main method of suicide. Rates of hanging increased until late 1990s and subsequently declined                                                                                  |
| Langmann (2020)                                                                                                     | C-17 | Yes | <ul style="list-style-type: none"> <li>• Decrease in the trend of suicide by firearm compared to hanging in males 45-59 yrs and &gt;60 yrs</li> <li>• Decrease in trend of female firearm suicide rates</li> </ul>                                                                                                                                                                                | Increasing trend in suicide by hanging for males 45-59 yrs and >60 yrs, and in females. Findings supported by sensitivity tests                                                                                                                  |
|                                                                                                                     | C-68 | No  | <ul style="list-style-type: none"> <li>• After 2001, there was an increase in firearms suicide compared to hanging for males (aggregate) and specifically for males 15-29 yrs and 30-44 yrs</li> </ul> <p>Covariates: province/territory, year, % license holders, alcohol consumption, unemployment rates, % aboriginal population, % low income persons</p>                                     | Increasing trend in suicide by hanging for males >60 yrs. Findings supported by sensitivity tests. Sensitivity tests supported substitution effect from suicide by firearm to hanging, and not a switch to hanging from other methods of suicide |
| SE, standard error; ARIMA, autoregressive integrated moving average; ZA, Zivot-Andrews; APC, annual percent change. |      |     |                                                                                                                                                                                                                                                                                                                                                                                                   |                                                                                                                                                                                                                                                  |
| <sup>1</sup> Significance of results are reported verbatim from the original article.                               |      |     |                                                                                                                                                                                                                                                                                                                                                                                                   |                                                                                                                                                                                                                                                  |
